# Supplementary material for: Novel Risk Variants in the Oxytocin Receptor Gene (OXTR) Possibly Linked to and Associated with Familial Type 2 Diabetes
Source: MDPI journal article supplement (doi:10.3390/ijms24076282), 2023-03-27
Supplement: s1 [file s1]

**Table S1.** OXTR-SNPs tested in Italian families with T2D. List of the 20 SNPs located within the OXTR gene, including the P value of the following analyses: LD/linkage, linkage/LD, and LD + linkage.

| Marker      | Model | LD Linkage | Linkage LD | LD+Linkage |
|-------------|-------|------------|------------|------------|
| rs11131147  | D1    | 0.145799   | 0.38108    | 0.246514   |
| rs1042778   | D1    | 0.932861   | 1          | 0.964694   |
| rs11706648  | D1    | 0.43457    | 0.475067   | 0.412904   |
| rs237887    | D1    | 0.0491     | 0.076305   | 0.056625   |
| rs918316    | D1    | 0.253764   | 1          | 0.387598   |
| rs116571980 | D1    | 0.50711    | 1          | 0.654799   |
| rs115396476 | D1    | 0.802052   | 1          | 0.862448   |
| rs2254295   | D1    | 0.886749   | 0.697847   | 0.802068   |
| rs60345038  | D1    | 0.400535   | 0.081377   | 0.124115   |
| rs237891    | D1    | 0.847529   | 1          | 0.914609   |
| rs77943865  | D1    | 0.114009   | 0.116407   | 0.200418   |
| rs35498753  | D1    | 0.057559   | 0.501747   | 0.104749   |
| rs115356575 | D1    | 0.066184   | 0.040051   | 0.075848   |
| rs2268495   | D1    | 0.624099   | 0.190433   | 0.237582   |
| rs61183828  | D1    | 0.155677   | 0.254593   | 0.260351   |
| rs237900    | D1    | 0.735687   | 1          | 0.84015    |
| rs61740241  | D1    | 0.282111   | 0.350106   | 0.421452   |
| rs4686302   | D1    | 0.139914   | 0.22337    | 0.14743    |
| rs2228485   | D1    | 0.115528   | 0.080183   | 0.133542   |
| rs62243375  | D1    | 0.304044   | 1          | 0.430423   |

| Marker      | Model | LD Linkage | Linkage LD | LD+Linkage |
|-------------|-------|------------|------------|------------|
| rs11131147  | D2    | 0.083667   | 0.510963   | 0.153829   |
| rs1042778   | D2    | 0.747826   | 1          | 0.845662   |
| rs11706648  | D2    | 0.200198   | 0.576166   | 0.280702   |
| rs237887    | D2    | 0.136393   | 0.170351   | 0.19598    |
| rs918316    | D2    | 0.914327   | 1          | 0.95428    |
| rs116571980 | D2    | 0.503016   | 1          | 0.651043   |
| rs115396476 | D2    | 0.924297   | 0.899689   | 0.942611   |
| rs2254295   | D2    | 0.532906   | 1          | 0.678098   |
| rs60345038  | D2    | 0.174773   | 0.224822   | 0.175445   |
| rs237891    | D2    | 0.737707   | 1          | 0.841585   |
| rs77943865  | D2    | 0.328882   | 0.581437   | 0.474872   |
| rs35498753  | D2    | 0.72721    | 0.843484   | 0.834054   |
| rs115356575 | D2    | 0.062995   | 0.107102   | 0.093294   |
| rs2268495   | D2    | 0.774376   | 0.814072   | 0.651374   |
| rs61183828  | D2    | 0.746874   | 1          | 0.848056   |
| rs237900    | D2    | 0.971622   | 1          | 0.985498   |
| rs61740241  | D2    | 0.321255   | 0.44651    | 0.466362   |
| rs4686302   | D2    | 0.113045   | 0.998871   | 0.181853   |
| rs2228485   | D2    | 0.065688   | 0.8721     | 0.124389   |
| rs62243375  | D2    | 0.167081   | 0.679308   | 0.216466   |

| Marker      | MODEL | LD Linkage | Linkage LD | LD+Linkage |
|-------------|-------|------------|------------|------------|
| rs11131147  | R1    | 0.218171   | 0.775892   | 0.34336    |
| rs1042778   | R1    | 0.637658   | 0.927441   | 0.766333   |
| rs11706648  | R1    | 0.45891    | 0.600649   | 0.551688   |
| rs237887    | R1    | 0.125318   | 0.188853   | 0.111305   |
| rs918316    | R1    | 0.469278   | 0.446877   | 0.522083   |
| rs116571980 | R1    | 0.522125   | 1          | 0.668441   |
| rs115396476 | R1    | 0.872738   | 1          | 0.799662   |
| rs2254295   | R1    | 0.474313   | 0.706985   | 0.615771   |
| rs60345038  | R1    | 0.044572   | 0.012759   | 0.022651   |
| rs237891    | R1    | 0.577272   | 1          | 0.640072   |
| rs77943865  | R1    | 0.158753   | 0.300857   | 0.264616   |
| rs35498753  | R1    | 0.14818    | 0.387575   | 0.112352   |
| rs115356575 | R1    | 0.440252   | 0.311886   | 0.449517   |
| rs2268495   | R1    | 0.706401   | 0.530967   | 0.41607    |
| rs61183828  | R1    | 0.093047   | 0.413529   | 0.168543   |
| rs237900    | R1    | 0.267886   | 0.407501   | 0.391166   |
| rs61740241  | R1    | 0.117475   | 0.224625   | 0.205574   |
| rs4686302   | R1    | 0.148908   | 0.294875   | 0.192067   |
| rs2228485   | R1    | 0.21026    | 0.27257    | 0.217457   |
| rs62243375  | R1    | 0.466988   | 1          | 0.617265   |

| Marker      | MODEL | LD Linkage | Linkage LD | LD+Linkage |
|-------------|-------|------------|------------|------------|
| rs11131147  | R2    | 0.114287   | 0.705706   | 0.200838   |
| rs1042778   | R2    | 0.574997   | 0.901771   | 0.714759   |
| rs11706648  | R2    | 0.162327   | 0.407663   | 0.230609   |
| rs237887    | R2    | 0.189171   | 0.197062   | 0.144209   |
| rs918316    | R2    | 0.779773   | 0.73785    | 0.750567   |
| rs116571980 | R2    | 0.414442   | 1          | 0.565601   |
| rs115396476 | R2    | 0.442784   | 0.457941   | 0.593829   |
| rs2254295   | R2    | 0.672547   | 0.698116   | 0.751596   |
| rs60345038  | R2    | 0.027526   | 0.01511    | 0.014908   |
| rs237891    | R2    | 0.543422   | 1          | 0.546132   |
| rs77943865  | R2    | 0.034101   | 0.09953    | 0.069956   |
| rs35498753  | R2    | 0.986376   | 0.200319   | 0.252676   |
| rs115356575 | R2    | 0.138072   | 0.119222   | 0.150265   |
| rs2268495   | R2    | 0.658632   | 0.263429   | 0.240676   |
| rs61183828  | R2    | 0.383327   | 0.693693   | 0.533595   |
| rs237900    | R2    | 0.571835   | 0.514318   | 0.633534   |
| rs61740241  | R2    | 0.070723   | 0.144918   | 0.133015   |
| rs4686302   | R2    | 0.040967   | 0.12619    | 0.053336   |
| rs2228485   | R2    | 0.733033   | 0.312017   | 0.43572    |
| rs62243375  | R2    | 0.448943   | 1          | 0.599778   |

**Table S2.** Results of LD matrix (correlation coefficient) of OXTR-tested SNPs in T2D. SNPs with  $r^2 \geq 0.9$  were considered “in LD”, otherwise were considered independent. Our SNPs are independent.

| rs_number   | rs11131147 | rs1042778 | rs11706648 | rs237887 | rs918316 | rs202112459 | rs116571980 | rs115396476 | rs2254295 | rs60345038 | rs237891 | rs77943865 | rs35498753 | rs115356575 | rs2268495 | rs61183828 | rs237900 | rs61740241 | rs4686302 | rs2228485 | rs62243375 |
|-------------|------------|-----------|------------|----------|----------|-------------|-------------|-------------|-----------|------------|----------|------------|------------|-------------|-----------|------------|----------|------------|-----------|-----------|------------|
| rs11131147  | 1          | 0.094     | 0.022      | 0.004    | 0.009    | NA          | 0.045       | 0           | 0.003     | 0.062      | 0.01     | 0.008      | 0          | 0.002       | 0.036     | 0          | 0.017    | 0.003      | 0         | 0.008     | 0.001      |
| rs1042778   | 0.094      | 1         | 0.091      | 0.271    | 0.032    | NA          | 0.074       | 0.019       | 0.05      | 0.166      | 0.013    | 0.019      | 0          | 0.026       | 0.007     | 0.003      | 0.034    | 0.002      | 0.001     | 0         | 0.048      |
| rs11706648  | 0.022      | 0.091     | 1          | 0.4      | 0.026    | NA          | 0.033       | 0.014       | 0.051     | 0.158      | 0.04     | 0.004      | 0.003      | 0.035       | 0.012     | 0          | 0.005    | 0          | 0.051     | 0.012     | 0.047      |
| rs237887    | 0.004      | 0.271     | 0.4        | 1        | 0.063    | NA          | 0.079       | 0.034       | 0.157     | 0.295      | 0.013    | 0.033      | 0.005      | 0.014       | 0.074     | 0          | 0.015    | 0.019      | 0.075     | 0.002     | 0.035      |
| rs918316    | 0.009      | 0.032     | 0.026      | 0.063    | 1        | NA          | 0.005       | 0.002       | 0.013     | 0.031      | 0.019    | 0.03       | 0          | 0.001       | 0         | 0.002      | 0.003    | 0.001      | 0.002     | 0.02      | 0.002      |
| rs202112459 | NA         | NA        | NA         | NA       | NA       | NA          | NA          | NA          | NA        | NA         | NA       | NA         | NA         | NA          | NA        | NA         | NA       | NA         | NA        | NA        | NA         |
| rs116571980 | 0.045      | 0.074     | 0.033      | 0.079    | 0.005    | NA          | 1           | 0.003       | 0.016     | 0.17       | 0.004    | 0.121      | 0.001      | 0.001       | 0.001     | 0.001      | 0.034    | 0.126      | 0.006     | 0.025     | 0.009      |
| rs115396476 | 0          | 0.019     | 0.014      | 0.034    | 0.002    | NA          | 0.003       | 1           | 0.007     | 0.016      | 0.003    | 0.001      | 0.006      | 0           | 0.009     | 0.001      | 0.011    | 0.001      | 0.004     | 0.01      | 0.004      |
| rs2254295   | 0.003      | 0.05      | 0.051      | 0.157    | 0.013    | NA          | 0.016       | 0.007       | 1         | 0.093      | 0.001    | 0.007      | 0.183      | 0.003       | 0.005     | 0.001      | 0.041    | 0.004      | 0.012     | 0.104     | 0.012      |
| rs60345038  | 0.062      | 0.166     | 0.158      | 0.295    | 0.031    | NA          | 0.17        | 0.016       | 0.093     | 1          | 0.1      | 0.024      | 0          | 0.03        | 0.085     | 0.002      | 0.005    | 0.016      | 0.068     | 0.044     | 0.028      |
| rs237891    | 0.01       | 0.013     | 0.04       | 0.013    | 0.019    | NA          | 0.004       | 0.003       | 0.001     | 0.1        | 1        | 0          | 0          | 0.019       | 0.047     | 0.022      | 0.001    | 0.002      | 0.003     | 0.016     | 0.011      |
| rs77943865  | 0.008      | 0.019     | 0.004      | 0.033    | 0.03     | NA          | 0.121       | 0.001       | 0.007     | 0.024      | 0        | 1          | 0.138      | 0           | 0.131     | 0.009      | 0.026    | 0.001      | 0.209     | 0.01      | 0.004      |
| rs35498753  | 0          | 0         | 0.003      | 0.005    | 0        | NA          | 0.001       | 0.006       | 0.183     | 0          | 0        | 0.138      | 1          | 0.002       | 0         | 0.007      | 0.082    | 0.003      | 0.028     | 0.244     | 0.019      |
| rs115356575 | 0.002      | 0.026     | 0.035      | 0.014    | 0.001    | NA          | 0.001       | 0           | 0.003     | 0.03       | 0.019    | 0          | 0.002      | 1           | 0.004     | 0.001      | 0.019    | 0          | 0.002     | 0.004     | 0.002      |
| rs2268495   | 0.036      | 0.007     | 0.012      | 0.074    | 0        | NA          | 0.001       | 0.009       | 0.005     | 0.085      | 0.047    | 0.131      | 0          | 0.004       | 1         | 0.17       | 0.195    | 0.005      | 0.443     | 0.209     | 0.03       |
| rs61183828  | 0          | 0.003     | 0          | 0        | 0.002    | NA          | 0.001       | 0.001       | 0.001     | 0.002      | 0.022    | 0.009      | 0.007      | 0.001       | 0.17      | 1          | 0.033    | 0.001      | 0.005     | 0.013     | 0.005      |
| rs237900    | 0.017      | 0.034     | 0.005      | 0.015    | 0.003    | NA          | 0.034       | 0.011       | 0.041     | 0.005      | 0.001    | 0.026      | 0.082      | 0.019       | 0.195     | 0.033      | 1        | 0.025      | 0.086     | 0.001     | 0.086      |
| rs61740241  | 0.003      | 0.002     | 0          | 0.019    | 0.001    | NA          | 0.126       | 0.001       | 0.004     | 0.016      | 0.002    | 0.001      | 0.003      | 0           | 0.005     | 0.001      | 0.025    | 1          | 0.002     | 0.006     | 0.002      |
| rs4686302   | 0          | 0.001     | 0.051      | 0.075    | 0.002    | NA          | 0.006       | 0.004       | 0.012     | 0.068      | 0.003    | 0.209      | 0.028      | 0.002       | 0.443     | 0.005      | 0.086    | 0.002      | 1         | 0.129     | 0.013      |
| rs2228485   | 0.008      | 0         | 0.012      | 0.002    | 0.02     | NA          | 0.025       | 0.01        | 0.104     | 0.044      | 0.016    | 0.01       | 0.244      | 0.004       | 0.209     | 0.013      | 0.001    | 0.006      | 0.129     | 1         | 0.035      |
| rs62243375  | 0.001      | 0.048     | 0.047      | 0.035    | 0.002    | NA          | 0.009       | 0.004       | 0.012     | 0.028      | 0.011    | 0.004      | 0.019      | 0.002       | 0.03      | 0.005      | 0.086    | 0.002      | 0.013     | 0.035     | 1          |
